# Supplementary material
Source: PubMed Central journal article supplement (PMC6535397)
Supplement: NIHMS1016370-supplement-Appendices.pdf [file NIHMS1016370-supplement-Appendices.pdf]

## APPENDICES

### Appendix 1: Definition of processes of care

| Process of care                                  | CPT4 code                       | HCPCS codes              |
|--------------------------------------------------|---------------------------------|--------------------------|
| Chronic Disease Management                       | 99053-99070, 99091              | G0181, G0182             |
| Cardiac Rehabilitation                           | 93797, 93798                    | G0422, G0423             |
| Transthoracic or Trans-esophageal Echocardiogram | 93306-93308, 93312-93314, 93318 | C8923-C8925, C8927-C8930 |

Appendix 2: Absolute standard difference of patient characteristics from pairwise comparison among primary care physicians (PCPs), nurse practitioners (NPs), and share care before and after propensity weight.

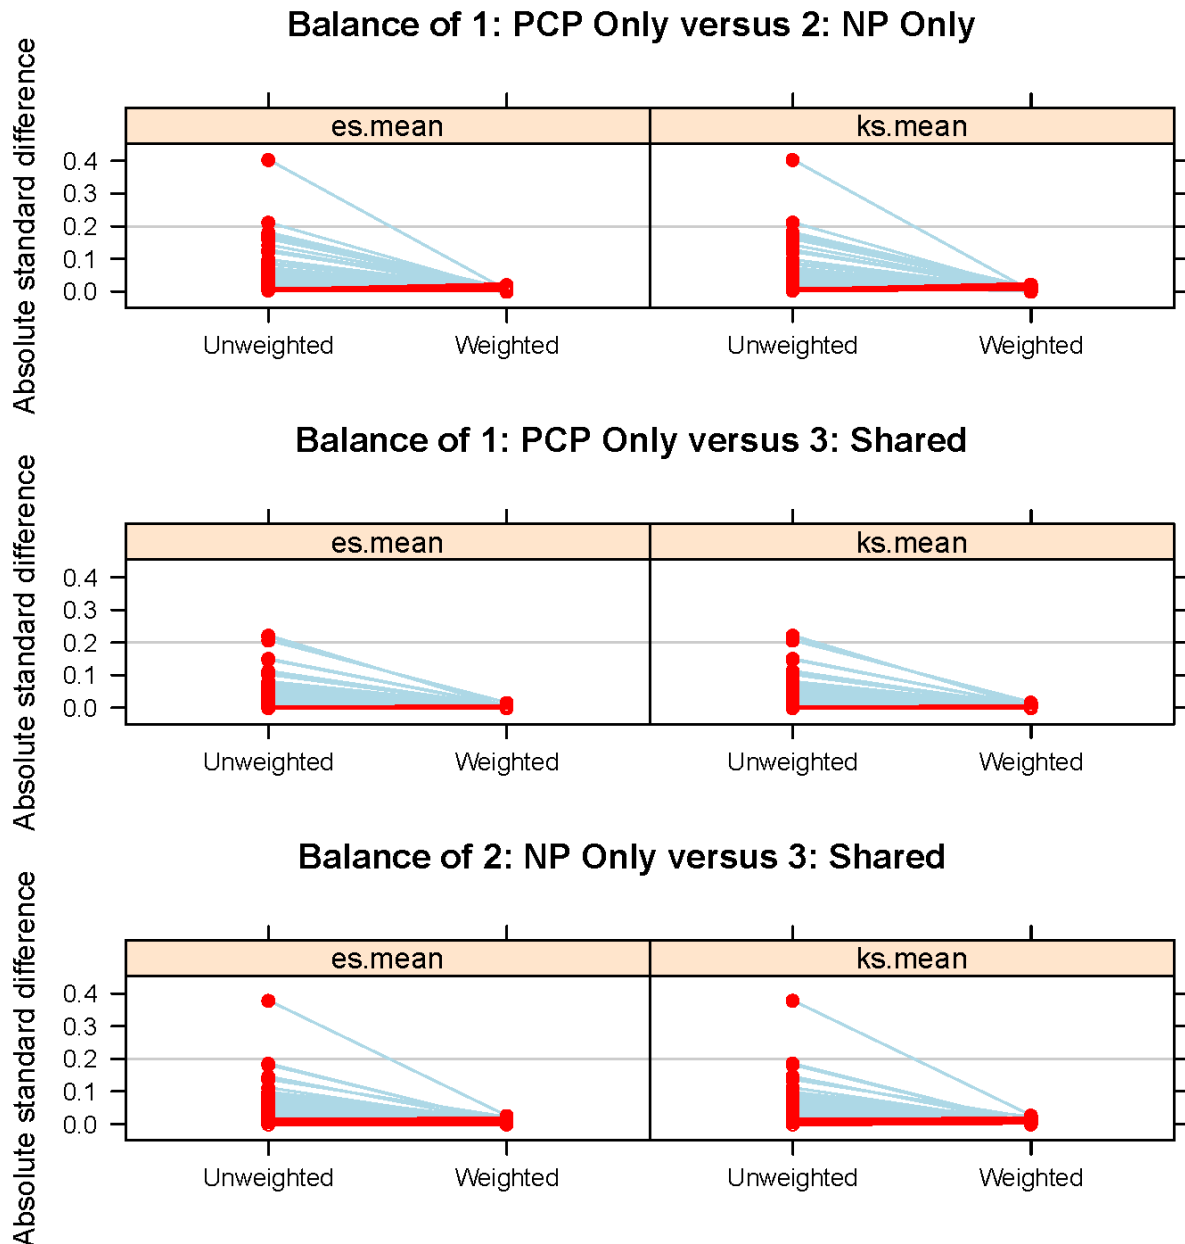

Appendix 3: Distribution of propensity scores among primary care physicians (PCPs), nurse practitioners (NPs), and share care providers.

### 1: PCP Only propensity scores by Tx group

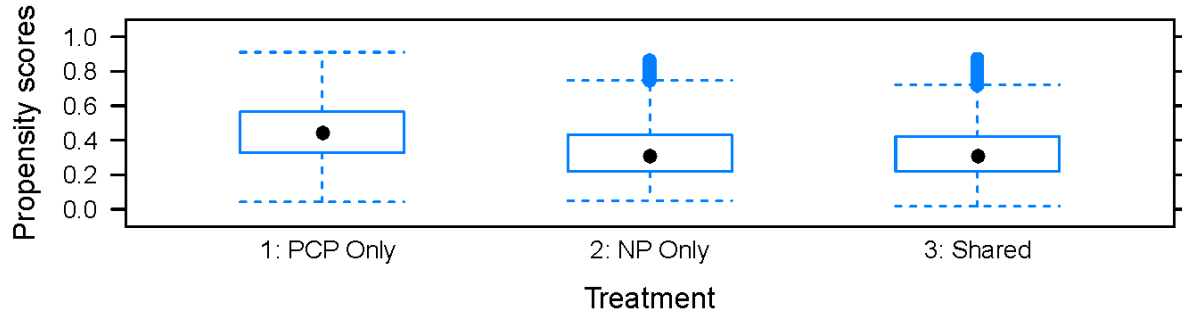

### 2: NP Only propensity scores by Tx group

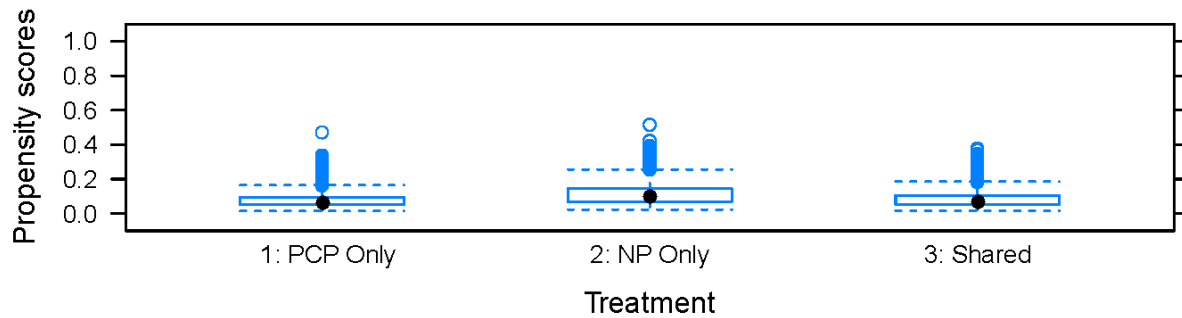

### 3: Shared propensity scores by Tx group

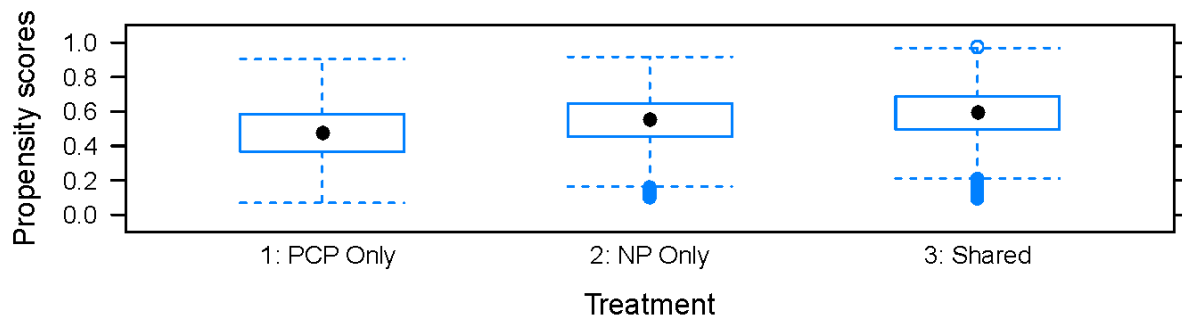

\*Tx group represents the primary care models.
